# Supplementary material for: Eudraguard® Natural and Protect: New “Food Grade” Matrices for the Delivery of an Extract from Sorbus domestica L. Leaves Active on the α-Glucosidase Enzyme
Source: MDPI journal article supplement (doi:10.3390/pharmaceutics15010295), 2023-01-16
Supplement: s1 [file s1]

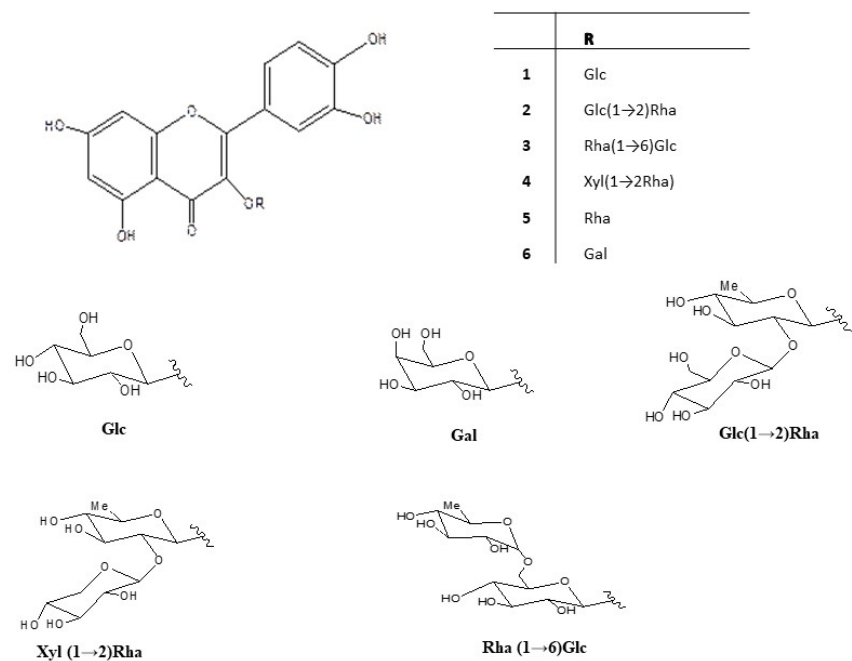

**Figure S1.** Structure of compounds isolated from SOE extract

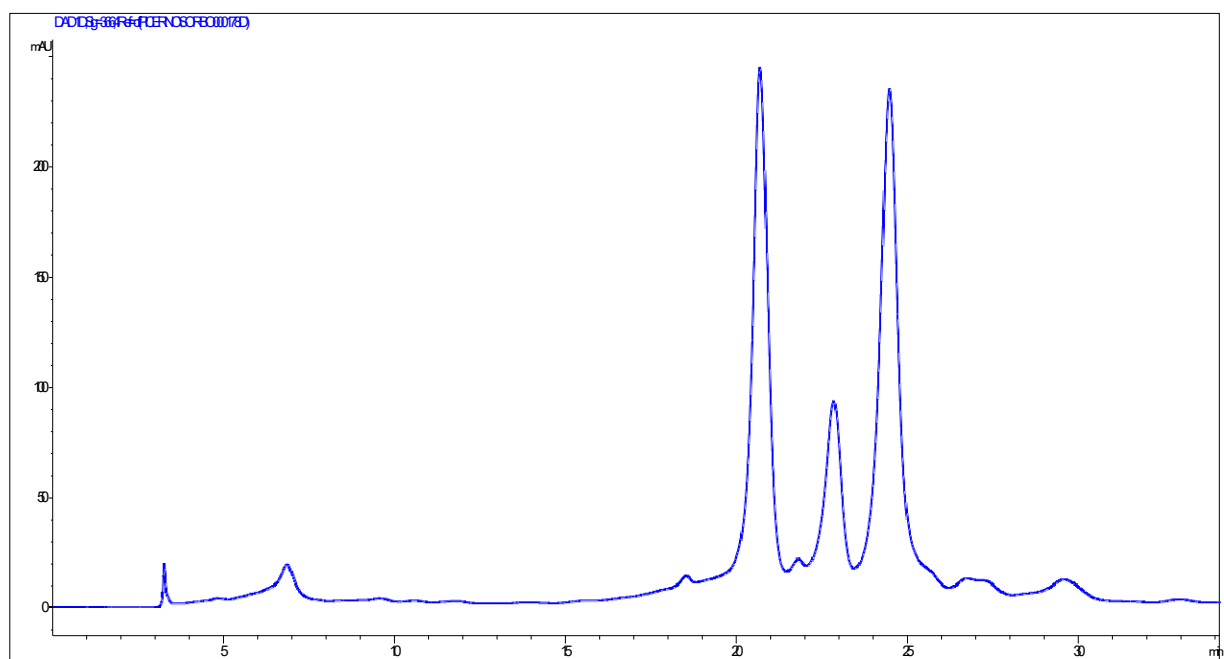

**Figure S2.** HPLC-UV/DAD profile of SOE (366 nm)

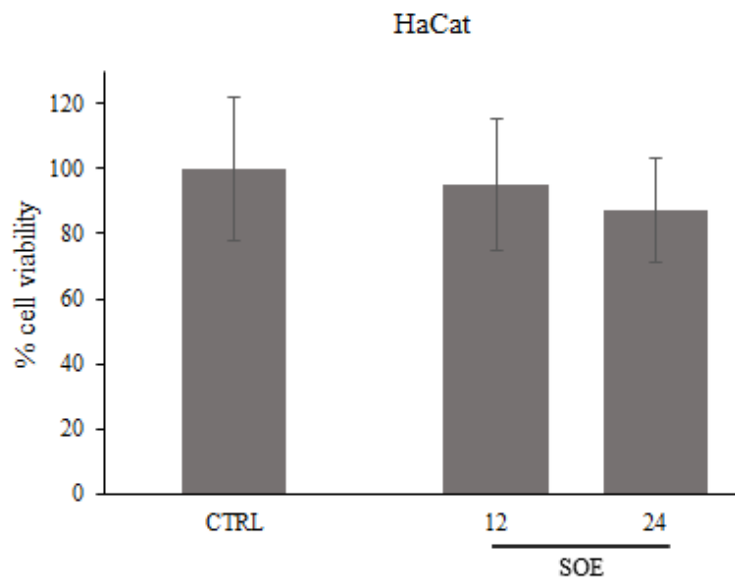

**Figure S3.** Viability of HaCaT cells (Immortalized human normal keratinocytes) after 48 h of incubation with different concentrations of SOE (12 or 24 mg/mL), determined by MTT assay. The data show the mean±S.D. of three independent experiments performed in triplicate and are expressed as % of control (% of Ctr, cells untreated). Statistical analysis was made using ANOVA followed by the Bonferroni test, a p value < 0.05 was considered statistically significant.
